# Supplementary material for: Metabolomics reveals metabolic changes in male reproductive cells exposed to thirdhand smoke
Source: PubMed Central journal article supplement (PMC4614949; doi:10.1038/srep15512), 2015-10-22
Supplement: srep15512-s1.pdf [file srep15512-s1.pdf]

# Metabolomics reveals metabolic changes in male reproductive cells exposed to thirdhand smoke

Bo Xu<sup>a, b, 1</sup>, Minjian Chen<sup>a, b, 1</sup>, Mengmeng Yao<sup>a, b, 1</sup>, Xiaoli Ji<sup>a, b</sup>, Zhilei Mao<sup>a, b</sup>, Wei Tang<sup>c</sup>, Shanlei Qiao<sup>a, b</sup>, Suzaynn F. Schick<sup>d</sup>, Jian-Hua Mao<sup>e</sup>, Bo Hang<sup>e\*</sup>, Yankai Xia<sup>a, b\*</sup>

<sup>a</sup>State Key Laboratory of Reproductive Medicine, Institute of Toxicology, Nanjing Medical University, Nanjing 211166, China

<sup>b</sup>Key Laboratory of Modern Toxicology of Ministry of Education, School of Public Health, Nanjing Medical University, Nanjing 211166, China

<sup>c</sup>Department of Endocrinology, The Affiliated Jiangyin Hospital of Wuxi Clinical School of Medicine, Nanjing Medical University, Jiangyin 214400, China

<sup>d</sup>Department of Medicine, Division of Occupational and Environmental Medicine, University of California, San Francisco, CA 94143, USA

<sup>e</sup>Department of Cancer & DNA Damage Responses, Life Sciences Division, Lawrence Berkeley National Laboratory, Berkeley, CA 94720, USA

<sup>1</sup>These authors contributed equally to this work.

\*To whom correspondence should be addressed:

Yankai Xia, Ph.D.

State Key Laboratory of Reproductive Medicine, Institute of Toxicology,

Nanjing Medical University, 101 Longmian boulevard, Nanjing 211166, China.

Tel: +86-25-86868425, Fax: +86-25-86868427, E-mail: yankaixia@njmu.edu.cn

Bo Hang, Ph.D.

Life Sciences Division, Lawrence Berkeley National Laboratory, Berkeley, USA

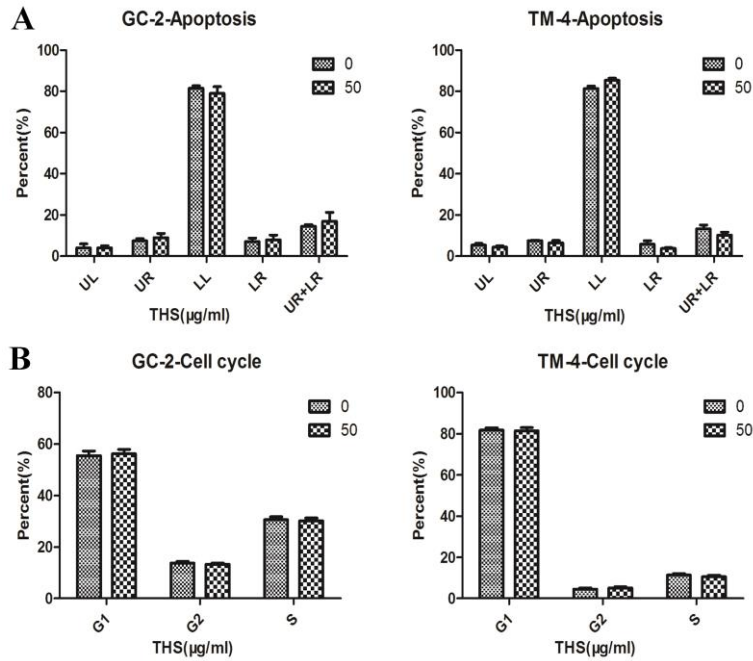

**Figure S1.** Effects of THS on apoptosis and cell cycle in GC-2 and TM4 cells. (A) The percentage of apoptotic cells in GC-2 and TM4 were presented in histogram. Cells in the LL quadrant indicated that they were live cells. Cells in the LR quadrant were in the early stages of apoptosis. Cells in the UR quadrant were late apoptotic. Cells in the UL quadrant indicated that they were dead cells. (B) The quantitated results of cell cycle in GC-2 and TM4 cells. Data of the experiment was expressed as a percentage of total cells. Each data point was represented as the means  $\pm$  S.E. from three separate experiments in which treatments were performed in triplicate.

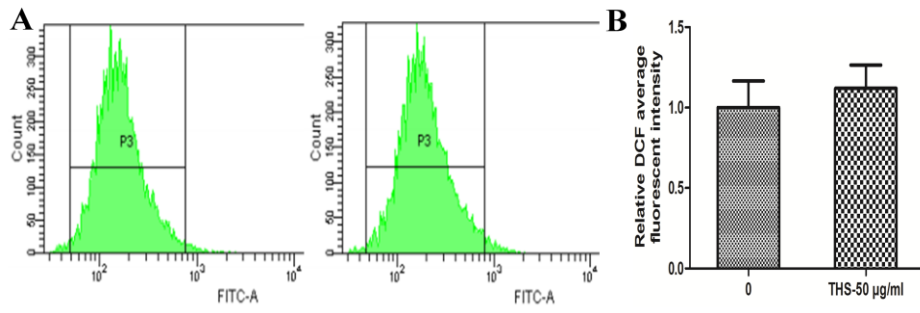

**Figure S2.** Comparison of ROS content in THS (50µg/ml) and control group. (A) Flow cytometry results of ROS content. x-axis, DCFH-DA fluorescence; y-axis, number of GC-2 cells. (B) The DCF average fluorescent intensity was also presented in histogram. Data were shown as the means  $\pm$  SE. \* indicates significant difference when the values were compared to that of the control ( $p < 0.05$ ).

Table S1. Sequences of primers for RT-PCR.

| <i>gene</i> |                | Sequences                     |
|-------------|----------------|-------------------------------|
| Gss         | Forward Primer | 5'- CAAAGCAGGCCATAGACAGGG-3'  |
|             | Reverse Primer | 5'- AAAAGCGTGAATGGGGCATAAC-3' |
| Ggt         | Forward Primer | 5'- CGCAAGCCTGCTGTGTATG-3'    |
|             | Reverse Primer | 5'- CGGGCATTGATAACCTCAACTT-3' |
| TK          | Forward Primer | 5'- AGTGCCTGGTCATCAAGTATGC-3' |
|             | Reverse Primer | 5'- GCTGCCACAATTAAGTCTTGC-3'  |
| SMS         | Forward Primer | 5'- GCGATTACCACCCATAGTTCG-3'  |
|             | Reverse Primer | 5'- TCTGCCAAATTAACATCCCCG-3'  |
| Glna        | Forward Primer | 5'- CAGAGACCAACTTGAGGCACA-3'  |
|             | Reverse Primer | 5'- CTCCATTCCAAACCAGGGGT-3'   |
| GAPDH       | Forward Primer | 5'-AGGTCGGTGTGAACGGATTTG-3'   |
|             | Reverse Primer | 5'-GGGGTCGTTGATGGCAACA-3'     |

Table S2. Metabolic profiles of metabolites in GC-2 cells

| Metabolite                   | VIP   | P Value | Fold change |
|------------------------------|-------|---------|-------------|
| Hydrocortisone               | 0.358 | 0.006   | 0.889       |
| P-benzoquinone               | 0.855 | 0.008   | 1.143       |
| 5-Aminovaleric acid          | 1.131 | 0.013   | 1.428       |
| Synephrine                   | 1.570 | 0.013   | 1.385       |
| Diglycerol                   | 1.168 | 0.013   | 0.541       |
| Pantothenic acid             | 1.899 | 0.016   | 1.404       |
| Cytidine-monophosphate       | 1.458 | 0.020   | 1.656       |
| Oxalic acid                  | 1.705 | 0.026   | 1.341       |
| 9-Fluorenone                 | 1.858 | 0.026   | 1.607       |
| Ethanolamine                 | 1.271 | 0.027   | 1.224       |
| 4-Vinylphenol dimer          | 0.553 | 0.028   | 1.133       |
| Oxoproline                   | 1.477 | 0.033   | 1.215       |
| L-glutamate                  | 1.959 | 0.036   | 0.436       |
| Glycine                      | 1.542 | 0.039   | 1.891       |
| Pelargonic acid              | 1.334 | 0.043   | 1.107       |
| 2-Ketoadipate                | 1.684 | 0.044   | 1.377       |
| Glutathione                  | 1.489 | 0.046   | 1.292       |
| 21-Hydroxypregnenolone       | 1.832 | 0.050   | 1.686       |
| N-Ethylglycine 1             | 0.978 | 0.058   | 0.533       |
| Malonamide                   | 0.977 | 0.059   | 1.307       |
| Threitol                     | 1.448 | 0.060   | 1.481       |
| Cumic Acid                   | 0.177 | 0.063   | 0.964       |
| N-(3-aminopropyl)-morpholine | 2.747 | 0.064   | 1.225       |
| Methylmalonic acid           | 1.555 | 0.068   | 1.229       |
| 3-Methylthiopropylamine      | 0.939 | 0.071   | 0.690       |
| Beta-Mannosylglycerate       | 1.537 | 0.073   | 0.394       |
| Dihydroxyacetone             | 0.216 | 0.077   | 0.904       |
| Thymol                       | 1.159 | 0.078   | 1.237       |
| (-)-Dihydrocarveol           | 0.596 | 0.085   | 0.728       |
| Hypoxanthine                 | 1.863 | 0.087   | 2.661       |
| Pyrophosphate                | 0.553 | 0.096   | 0.716       |
| Sorbitol                     | 0.939 | 0.098   | 0.815       |
| Glutamine                    | 1.256 | 0.100   | 1.301       |
| 5-Methoxytryptamine          | 0.291 | 0.104   | 1.073       |
| N-alpha-Acetyl-L-ornithine   | 1.694 | 0.108   | 1.684       |
| Linoleic acid                | 2.814 | 0.111   | 1.469       |
| Ribitol                      | 0.076 | 0.113   | 0.980       |
| Phenylethylamine             | 1.194 | 0.117   | 1.231       |
| 1,3-Diaminopropane           | 1.030 | 0.118   | 1.203       |
| 2'-Deoxyguanosine            | 1.561 | 0.119   | 0.579       |
| Uracil                       | 0.554 | 0.121   | 0.896       |

|                            |       |       |       |
|----------------------------|-------|-------|-------|
| Tyrosine                   | 0.623 | 0.122 | 1.232 |
| Citric acid                | 1.745 | 0.122 | 1.587 |
| Maleimide                  | 0.990 | 0.122 | 1.202 |
| N-Methyl-L-glutamic acid   | 0.686 | 0.130 | 0.770 |
| D-Glyceric acid            | 1.784 | 0.130 | 0.615 |
| Dithioerythritol           | 1.357 | 0.131 | 1.200 |
| 3-Ureidopropionate         | 2.046 | 0.133 | 0.741 |
| 2-Hydroxypyridine          | 1.191 | 0.137 | 1.261 |
| Galactinol                 | 1.429 | 0.138 | 1.737 |
| 5-Dihydrocortisol          | 2.071 | 0.138 | 1.472 |
| 3,4-Dihydroxymandelic acid | 1.153 | 0.139 | 1.297 |
| L-homoserine               | 0.838 | 0.145 | 1.274 |
| 3,5-Dihydroxyphenylglycine | 0.994 | 0.147 | 1.136 |
| Glycocyanine               | 0.895 | 0.151 | 1.407 |
| Fucose                     | 0.954 | 0.153 | 1.175 |
| Fumaric acid               | 0.838 | 0.159 | 1.191 |
| Pentadecanoic acid         | 1.118 | 0.159 | 1.298 |
| D-erythronolactone         | 0.907 | 0.164 | 1.515 |
| Oxamic acid                | 0.371 | 0.165 | 0.996 |
| N-Methyl-DL-alanine        | 0.735 | 0.184 | 1.120 |
| Hydrocinnamic acid         | 0.634 | 0.184 | 1.348 |
| Glucose                    | 0.179 | 0.185 | 0.915 |
| N-epsilon-Acetyl-L-lysine  | 0.960 | 0.185 | 1.796 |
| Methyl Phosphate           | 1.129 | 0.212 | 0.566 |
| Tartronic acid             | 1.046 | 0.220 | 1.214 |
| Alanine                    | 0.652 | 0.224 | 0.867 |
| Carnitine                  | 0.951 | 0.231 | 0.649 |
| 3,6-Anhydro-D-galactose    | 0.965 | 0.231 | 0.838 |
| Phosphomycin               | 1.392 | 0.234 | 0.552 |
| Methyl heptadecanoate      | 1.103 | 0.240 | 1.437 |
| 4-Aminobutyric acid        | 0.918 | 0.247 | 1.129 |
| L-Malic acid               | 1.204 | 0.271 | 2.035 |
| Myristic Acid              | 1.150 | 0.275 | 1.565 |
| Myo-inositol               | 0.166 | 0.276 | 0.946 |
| Noradrenaline              | 0.709 | 0.282 | 1.220 |
| Thymidine                  | 0.679 | 0.293 | 1.237 |
| Conduritol b epoxide       | 1.152 | 0.295 | 1.131 |
| Adenosine                  | 1.065 | 0.299 | 1.601 |
| 2,3-Dihydroxypyridine      | 0.830 | 0.309 | 0.998 |
| Guanosine-5'-monophosphate | 0.780 | 0.311 | 1.087 |
| 2-Ketobutyric acid         | 0.949 | 0.311 | 0.786 |
| Elaidic acid               | 0.351 | 0.314 | 1.061 |
| Aminomalonic acid          | 0.142 | 0.315 | 0.969 |
| Valine                     | 1.085 | 0.323 | 0.766 |

|                                   |       |       |       |
|-----------------------------------|-------|-------|-------|
| Serine                            | 0.729 | 0.324 | 0.778 |
| Biuret                            | 0.608 | 0.327 | 0.922 |
| Spermidine                        | 0.872 | 0.331 | 1.373 |
| Zymosterol                        | 1.069 | 0.332 | 1.387 |
| D-(glycerol 1-phosphate)          | 0.594 | 0.337 | 0.804 |
| Methyl Palmitoleate               | 1.491 | 0.338 | 1.480 |
| Ornithine                         | 0.520 | 0.341 | 0.922 |
| Putrescine                        | 0.217 | 0.347 | 0.990 |
| O-Phosphorylethanolamine          | 1.010 | 0.352 | 0.535 |
| Tricetin                          | 0.724 | 0.353 | 1.122 |
| 4-Acetamidobutyric acid           | 1.040 | 0.362 | 0.503 |
| Prostaglandin E2                  | 1.006 | 0.365 | 1.516 |
| 3-Hydroxypyridine                 | 0.465 | 0.374 | 1.077 |
| 7-Hydroxy-4-androstene-3,17-dione | 0.785 | 0.374 | 1.142 |
| Taurine                           | 0.223 | 0.377 | 0.925 |
| O-Phosphoserine                   | 0.971 | 0.377 | 1.162 |
| Guanine                           | 0.142 | 0.399 | 1.096 |
| Phthalic acid                     | 0.860 | 0.401 | 0.610 |
| Cycloleucine                      | 1.274 | 0.413 | 1.549 |
| Methionine                        | 0.790 | 0.419 | 0.834 |
| Heptadecanoic acid                | 0.890 | 0.424 | 1.267 |
| Isoleucine                        | 0.791 | 0.439 | 0.810 |
| Lactose                           | 0.878 | 0.441 | 1.327 |
| O-methylthreonine                 | 0.781 | 0.450 | 0.714 |
| L-Allothreonine                   | 0.742 | 0.450 | 1.125 |
| Cytosin                           | 0.851 | 0.450 | 0.611 |
| L-cysteine                        | 0.588 | 0.463 | 1.215 |
| Alpha-ketoglutaric acid           | 0.784 | 0.464 | 0.846 |
| Asparagine                        | 1.094 | 0.481 | 0.876 |
| Aspartic acid                     | 0.683 | 0.482 | 1.276 |
| Phenylalanine                     | 0.090 | 0.488 | 1.027 |
| Hydroxylamine                     | 0.723 | 0.499 | 0.846 |
| 2'-Deoxycytidine 5'-triphosphate  | 0.526 | 0.519 | 1.190 |
| 1-Methylhydantoin 2               | 1.555 | 0.528 | 0.561 |
| 2'-Hydroxyacetophenone            | 0.684 | 0.529 | 1.165 |
| O-phosphonothreonine              | 0.145 | 0.529 | 1.274 |
| Nicotinamide                      | 0.605 | 0.536 | 1.141 |
| Fructose                          | 0.345 | 0.536 | 0.936 |
| N-Acetyltryptophan                | 0.107 | 0.549 | 0.973 |
| Maleic acid                       | 0.313 | 0.554 | 0.864 |
| Nicotinic acid                    | 0.426 | 0.560 | 1.153 |
| N-Acetyl-beta-D-mannosamine       | 0.632 | 0.564 | 1.296 |
| 6-Methylmercaptopurine            | 0.232 | 0.567 | 0.985 |
| D-alanyl-D-alanine                | 0.530 | 0.575 | 1.153 |

|                                    |       |       |       |
|------------------------------------|-------|-------|-------|
| 22-Ketocholesterol                 | 0.865 | 0.576 | 0.578 |
| Benzoic acid                       | 0.123 | 0.585 | 1.058 |
| 2-Monopalmitin                     | 0.080 | 0.596 | 1.178 |
| Thymine                            | 0.404 | 0.627 | 0.811 |
| Gluconic lactone                   | 0.458 | 0.629 | 1.072 |
| Adenine                            | 0.421 | 0.651 | 1.095 |
| L-dopa                             | 0.245 | 0.670 | 0.916 |
| 2-Deoxyerythritol                  | 0.256 | 0.677 | 0.949 |
| Methyl-beta-D-galactopyranoside    | 0.526 | 0.679 | 1.132 |
| Glutaraldehyde                     | 0.055 | 0.679 | 1.000 |
| Malonic acid                       | 0.405 | 0.684 | 0.775 |
| 4-Methylbenzyl alcohol             | 0.457 | 0.692 | 1.061 |
| Lyxose                             | 0.326 | 0.703 | 0.897 |
| 2,4-Diaminobutyric acid            | 0.062 | 0.709 | 0.973 |
| L-Threose                          | 0.748 | 0.711 | 1.091 |
| 4-Androsten-11beta-ol-3,17-dione   | 0.412 | 0.727 | 0.943 |
| Indolelactate                      | 0.022 | 0.732 | 1.005 |
| Lysine                             | 0.168 | 0.738 | 1.057 |
| Cis-gondoic acid                   | 0.373 | 0.791 | 1.098 |
| 1-Monopalmitin                     | 0.655 | 0.792 | 1.058 |
| Threonine                          | 0.318 | 0.809 | 1.103 |
| Orotic acid                        | 0.101 | 0.809 | 0.971 |
| Phosphate                          | 0.760 | 0.829 | 1.020 |
| Uridine monophosphate              | 0.523 | 0.849 | 0.916 |
| Arachidonic acid                   | 0.011 | 0.860 | 1.038 |
| Norvaline                          | 0.328 | 0.887 | 0.928 |
| Beta-Alanine                       | 0.115 | 0.906 | 0.977 |
| Proline                            | 1.004 | 0.911 | 1.194 |
| Ascorbate                          | 0.319 | 0.922 | 1.012 |
| Creatine                           | 0.099 | 0.922 | 1.017 |
| 4',5-Dihydroxy-7-methoxyisoflavone | 0.614 | 0.949 | 1.325 |
| Lactic acid                        | 0.360 | 0.957 | 0.666 |
| Thymidine 5'-monophosphate         | 0.002 | 0.980 | 1.000 |

---



Table S3. Metabolic profiles of metabolites in TM4 cells

| Metabolite                           | VIP   | P Value | Fold change |
|--------------------------------------|-------|---------|-------------|
| 1,3-diaminopropane                   | 0.173 | 0.773   | 0.955       |
| 1-Methylhydantoin                    | 0.714 | 0.311   | 1.237       |
| 1-Monopalmitin                       | 0.751 | 0.534   | 1.441       |
| 2,3-Dihydroxypyridine                | 1.342 | 0.217   | 0.902       |
| 2,4-Diaminobutyric acid              | 0.061 | 0.564   | 0.994       |
| 22-Ketocholesterol                   | 0.600 | 0.629   | 0.660       |
| 2'-Deoxycytidine 5'-triphosphate     | 0.713 | 0.123   | 0.698       |
| 2-Deoxyerythritol                    | 0.763 | 0.381   | 0.625       |
| 2-Deoxyuridine                       | 0.044 | 0.256   | 0.913       |
| 2'-Hydroxyacetophenone               | 0.822 | 0.469   | 0.587       |
| 2-Hydroxypyridine                    | 1.286 | 0.374   | 0.000       |
| 2-Ketoadipate                        | 1.302 | 0.342   | 0.724       |
| 2-Ketobutyric acid                   | 0.060 | 0.639   | 1.012       |
| 2-Monoolein                          | 0.708 | 0.628   | 0.594       |
| 2-Monopalmitin                       | 0.706 | 0.362   | 0.496       |
| 3 Beta-Hydroxy-5beta-pregnane-20-one | 1.375 | 0.267   | 1.814       |
| 3,4-Dihydroxymandelic acid           | 0.753 | 0.325   | 0.651       |
| 3-Hydroxypyridine                    | 0.083 | 0.789   | 1.018       |
| 3-Methylthiopropylamine              | 0.305 | 0.813   | 1.027       |
| 3-Ureidopropionate                   | 1.809 | 0.050   | 1.341       |
| 4',5-Dihydroxy-7-methoxyisoflavone   | 1.290 | 0.456   | 0.797       |
| 4-Acetamidobutyric acid              | 0.438 | 0.634   | 1.165       |
| 4-Aminobutyric acid                  | 0.782 | 0.702   | 1.092       |
| 4-Androsten-11beta-ol-3,17-dione     | 1.386 | 0.054   | 1.288       |
| 4-Methylbenzyl alcohol               | 0.761 | 0.446   | 1.463       |
| 4-Vinylphenol dimer                  | 0.505 | 0.453   | 1.204       |
| 5-Aminovaleric acid                  | 0.402 | 0.776   | 0.840       |
| 5-Methoxytryptamine                  | 0.250 | 0.178   | 1.169       |
| 5'-Methylthioadenosine               | 0.017 | 0.825   | 1.000       |
| 6-Methylmercaptapurine               | 1.574 | 0.145   | 0.460       |
| 7-Hydroxy-4-androstene-3,17-dione    | 0.572 | 0.628   | 0.516       |
| 8-Aminocaprylic acid                 | 1.563 | 0.060   | 1.127       |
| 9-Fluorenone                         | 0.496 | 0.560   | 0.656       |
| Adenine                              | 0.333 | 0.500   | 1.133       |
| Adenosine                            | 1.781 | 0.036   | 0.650       |
| Alanine                              | 0.041 | 0.782   | 0.984       |
| Alpha-ketoglutaric acid              | 0.022 | 0.273   | 1.007       |
| Aminomalonic acid                    | 1.476 | 0.113   | 1.758       |
| Ascorbate                            | 0.875 | 0.392   | 0.189       |
| Asparagine                           | 1.362 | 0.140   | 1.704       |
| Aspartic acid                        | 0.046 | 0.943   | 1.012       |

|                            |       |       |       |
|----------------------------|-------|-------|-------|
| Benzoic acid               | 1.470 | 0.363 | 0.708 |
| Beta-Alanine               | 0.136 | 0.442 | 0.980 |
| Beta-Mannosylglycerate     | 0.601 | 0.196 | 0.507 |
| Biuret                     | 0.445 | 0.686 | 1.232 |
| Carnitine                  | 0.116 | 0.601 | 1.037 |
| Cis-gondoic acid           | 1.035 | 0.027 | 1.339 |
| Citraconic acid            | 1.306 | 0.139 | 0.674 |
| Citric acid                | 1.585 | 0.061 | 0.498 |
| Citrulline                 | 0.731 | 0.326 | 1.419 |
| Conduritol b epoxide       | 0.251 | 0.553 | 1.043 |
| Creatine                   | 2.263 | 0.048 | 2.001 |
| Cumic Acid                 | 1.171 | 0.339 | 0.882 |
| Cyclohexylsulfamic acid    | 0.894 | 0.148 | 3.541 |
| Cycloleucine               | 0.864 | 0.233 | 1.182 |
| Cytidine-monophosphate     | 0.307 | 0.625 | 1.264 |
| Cytosin                    | 0.016 | 0.776 | 0.994 |
| D-(glycerol 1-phosphate)   | 0.907 | 0.175 | 0.700 |
| D-alanyl-D-alanine         | 0.705 | 0.493 | 1.224 |
| D-erythronolactone         | 0.796 | 0.186 | 2.282 |
| D-Glyceric acid            | 0.051 | 0.948 | 0.992 |
| Diglycerol                 | 0.035 | 0.844 | 0.990 |
| Dihydrotestosterone        | 0.754 | 0.312 | 1.473 |
| Diocetyl phthalate         | 0.263 | 0.436 | 1.164 |
| Dithioerythritol           | 0.409 | 0.674 | 0.950 |
| dTMP                       | 1.500 | 0.030 | 0.649 |
| Elaidic acid               | 0.102 | 0.186 | 1.040 |
| Ethanolamine               | 0.372 | 0.773 | 1.037 |
| Farnesal                   | 1.030 | 0.817 | 0.563 |
| Fructose                   | 0.739 | 0.201 | 0.933 |
| Fumaric acid               | 0.118 | 0.853 | 0.978 |
| Galactinol                 | 0.533 | 0.781 | 0.822 |
| Gluconic lactone           | 0.228 | 0.590 | 1.028 |
| Glucose                    | 0.966 | 0.332 | 0.655 |
| Glutamic acid              | 1.057 | 0.202 | 1.209 |
| Glutamine                  | 2.424 | 0.007 | 2.495 |
| Glutaraldehyde             | 0.229 | 0.781 | 0.973 |
| Glutathione                | 1.122 | 0.276 | 1.228 |
| Glycine                    | 0.777 | 0.546 | 0.899 |
| Glycocyamine               | 0.997 | 0.538 | 0.158 |
| Guanine                    | 0.053 | 0.611 | 0.991 |
| Guanosine-5'-monophosphate | 0.511 | 0.664 | 0.734 |
| Heptadecanoic acid         | 0.584 | 0.223 | 1.182 |
| Hydrocinnamic acid         | 1.422 | 0.095 | 1.229 |
| Hydrocortisone             | 1.035 | 0.018 | 0.522 |

|                                 |       |       |       |
|---------------------------------|-------|-------|-------|
| Hydroxylamine                   | 2.040 | 0.043 | 1.317 |
| Hypoxanthine                    | 0.971 | 0.157 | 1.253 |
| Indolelactate                   | 1.551 | 0.044 | 0.545 |
| Isoleucine                      | 1.403 | 0.103 | 1.218 |
| Lactic acid                     | 1.942 | 0.072 | 1.607 |
| Lactose                         | 0.119 | 0.484 | 1.026 |
| L-Allothreonine                 | 0.571 | 0.658 | 1.037 |
| L-cysteine                      | 1.098 | 0.233 | 0.842 |
| L-dopa                          | 0.087 | 0.761 | 0.987 |
| L-homoserine                    | 0.344 | 0.544 | 1.082 |
| L-Malic acid                    | 0.412 | 0.385 | 0.867 |
| L-Threose                       | 1.534 | 0.183 | 0.713 |
| Lysine                          | 0.378 | 0.634 | 1.068 |
| Lyxose                          | 1.594 | 0.163 | 0.440 |
| Maleic acid                     | 0.365 | 0.150 | 0.896 |
| Maleimide                       | 0.344 | 0.779 | 0.957 |
| Malonamide                      | 0.463 | 0.725 | 0.794 |
| Malonic acid                    | 1.793 | 0.033 | 0.712 |
| Methionine                      | 0.859 | 0.447 | 1.106 |
| Methyl heptadecanoate           | 1.300 | 0.213 | 0.540 |
| Methyl Palmitoleate             | 0.332 | 0.485 | 1.114 |
| Methyl Phosphate                | 0.257 | 0.589 | 0.957 |
| Methyl-beta-D-galactopyranoside | 1.786 | 0.089 | 2.090 |
| Methylmalonic acid              | 0.270 | 0.687 | 0.857 |
| Myo-inositol                    | 0.128 | 0.661 | 0.956 |
| Myristic Acid                   | 1.092 | 0.153 | 0.611 |
| N-(3-aminopropyl)-morpholine    | 0.213 | 0.305 | 1.051 |
| N(epsilon)-Trimethyllysine      | 0.860 | 0.043 | 0.792 |
| N-Acetyl-beta-D-mannosamine     | 0.126 | 0.273 | 0.980 |
| N-Acetylisatin                  | 0.236 | 0.820 | 0.788 |
| N-Acetyltryptophan              | 0.143 | 0.609 | 0.974 |
| N-alpha-Acetyl-L-ornithine      | 1.092 | 0.032 | 1.282 |
| Naphthalene                     | 2.004 | 0.030 | 1.303 |
| N-Ethylglycine                  | 0.779 | 0.548 | 0.914 |
| Nicotinamide                    | 1.092 | 0.108 | 0.812 |
| Nicotinic acid                  | 1.048 | 0.026 | 1.430 |
| N-methylaniline                 | 0.593 | 0.260 | 0.905 |
| N-Methyl-DL-alanine             | 0.669 | 0.563 | 0.935 |
| N-Methyl-L-glutamic acid        | 0.004 | 0.412 | 0.998 |
| Noradrenaline                   | 2.424 | 0.027 | 1.424 |
| Norleucine                      | 0.673 | 0.631 | 0.644 |
| Norvaline                       | 0.807 | 0.366 | 1.089 |
| O-methylthreonine               | 0.376 | 0.026 | 0.873 |
| O-Phosphorylethanolamine        | 0.105 | 0.223 | 0.961 |

|                       |       |       |       |
|-----------------------|-------|-------|-------|
| O-Phosphoserine       | 1.077 | 0.064 | 0.812 |
| Ornithine             | 1.560 | 0.143 | 1.931 |
| Orotic acid           | 1.057 | 0.095 | 0.608 |
| Oxalic acid           | 0.058 | 0.783 | 1.012 |
| Oxoproline            | 1.220 | 0.216 | 1.134 |
| Pantothenic acid      | 1.717 | 0.024 | 1.200 |
| Pelargonic acid       | 0.425 | 0.670 | 0.879 |
| Pentadecanoic acid    | 1.096 | 0.301 | 0.223 |
| Phenylalanine         | 1.441 | 0.075 | 1.338 |
| Phenylethylamine      | 0.538 | 0.629 | 0.950 |
| Phosphate             | 1.046 | 0.456 | 1.101 |
| Phosphomycin          | 0.232 | 0.669 | 1.100 |
| Phthalic acid         | 1.105 | 0.310 | 0.811 |
| Proline               | 0.732 | 0.193 | 1.164 |
| Prostaglandin E2      | 0.014 | 0.296 | 0.972 |
| Putrescine            | 0.684 | 0.373 | 0.535 |
| Pyrophosphate         | 0.918 | 0.415 | 0.561 |
| Ribitol               | 0.780 | 0.333 | 1.117 |
| Serine                | 0.031 | 0.877 | 1.022 |
| Shikimic acid         | 0.344 | 0.097 | 1.121 |
| Sorbitol              | 1.506 | 0.063 | 1.544 |
| Sorbose               | 0.729 | 0.313 | 1.363 |
| Spermidine            | 2.039 | 0.036 | 0.367 |
| Synephrine            | 0.322 | 0.355 | 1.069 |
| Taurine               | 0.900 | 0.632 | 0.889 |
| Threitol              | 1.469 | 0.192 | 0.705 |
| Thymidine             | 1.770 | 0.020 | 0.356 |
| Thymine               | 0.179 | 0.655 | 1.074 |
| Thymol                | 1.043 | 0.402 | 0.835 |
| Tricetin              | 0.269 | 0.904 | 0.940 |
| Tyrosine              | 0.356 | 0.258 | 0.947 |
| Uracil                | 2.048 | 0.019 | 2.074 |
| Uridine monophosphate | 2.546 | 0.272 | 2.560 |
| Valine                | 0.860 | 0.485 | 1.118 |
| Zymosterol            | 0.581 | 0.481 | 1.288 |

---
